# Supplementary material for: New insights on thyroid hormone mediated regulation of herpesvirus infections
Source: PubMed Central journal article supplement (PMC5360088; doi:10.1186/s13578-017-0140-z), 2017-03-21
Supplement: 13578_2017_140_MOESM1_ESM.pdf [file 13578_2017_140_MOESM1_ESM.pdf]

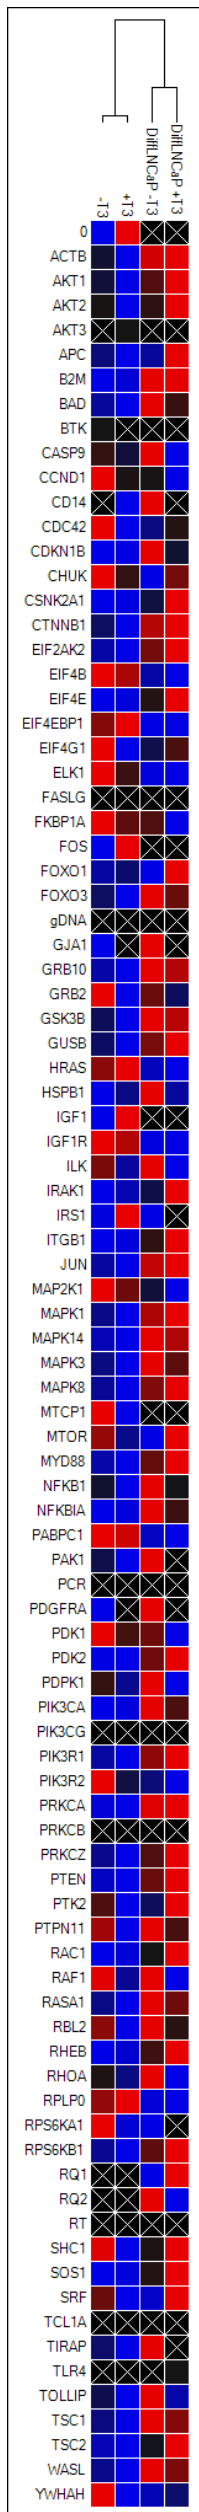

Figure S1. Bio-Rad PrimePCR, qRT-PCR Array, Human PI3K-AKT signaling pathway (SAB Target List) H96. Complete 84 gene expression heatmap. See main text for assay details.
